# Supplementary material
Source: Springer Nature journal article supplement (https://www.springermedizin.de/resource/supplementary/12943_2013_1482_MOESM22_ESM.pdf/9553114)

SLIT2

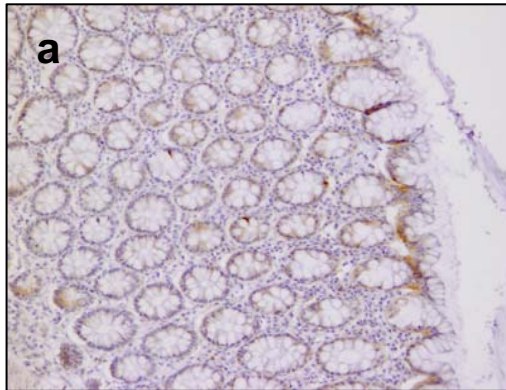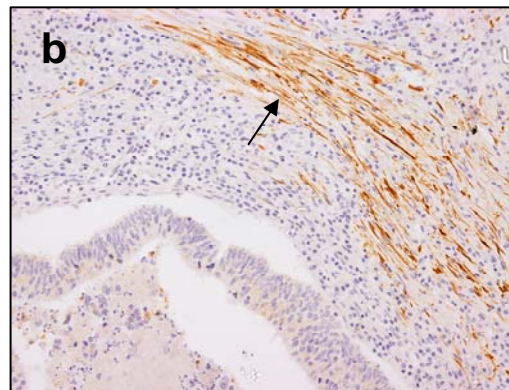

ROBO2

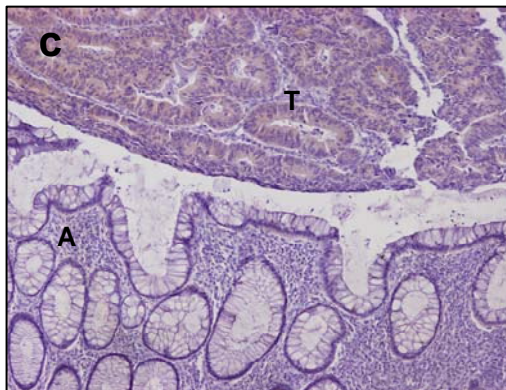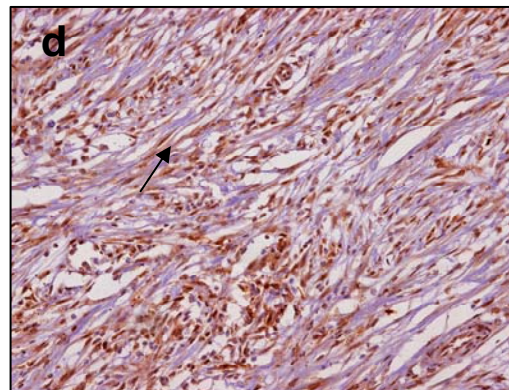

Supplement: MOESM22 [file 9553114]
